# Supplementary material for: Sinorhizobium meliloti GR4 Produces Chromosomal- and pSymA-Encoded Type IVc Pili That Influence the Interaction with Alfalfa Plants
Source: MDPI journal article supplement (doi:10.3390/plants13050628), 2024-02-25
Supplement: s1 [file s1]

# ***Sinorhizobium meliloti* GR4 produces chromosomal- and pSymA-encoded Type IVc Pili that influence the interaction with alfalfa plants**

Cristina Carvia-Hermoso<sup>1</sup>, Virginia Cuéllar<sup>1</sup>, Lydia M. Bernabéu-Roda<sup>1</sup>, Pieter van Dillewijn<sup>1,\*</sup>, María José Soto<sup>1,\*</sup>

## **List of Supplementary Material**

**Figure S1.** Predictive protein composition and structure of the secretion systems encoded by *S. meliloti* *tad/cpa* genes of the *flp-1* cluster, *flp-2* cluster and Locus 3.

**Figure S2.** Multiple sequence alignment by MUSCLE of Flp prepilins.

**Figure S3.** Multiple sequence alignment by MUSCLE of PilQ2-like gene products.

**Figure S4.** Multiple sequence alignment by MUSCLE of SMa0164 with homologous proteins of *S. fredii* NGR234 (Sf) and *B. diazoefficiens* (Bd).

**Figure S5.** Multiple sequence alignment by MUSCLE of SMa0166 with TadD-like gene products.

**Figure S6.** Transmission electron microscope (TEM) images of flagella-plus single and double *flp* deletion mutants.

**Figure S7.** Twitching motility assay of duplicate stab inoculations of the different strains on different media with different agar concentrations and types.

**Figure S8.** Appearance of alfalfa plants inoculated with *S. meliloti flp* mutant strains at the end of the nodulation kinetics experiment.

**Table S1.** Percent sequence identities (in parenthesis) among *S. meliloti* T4cP paralogues.

**Table S2.** Strains and plasmids used in this study.

**Table S3.** List of primers used in this study.

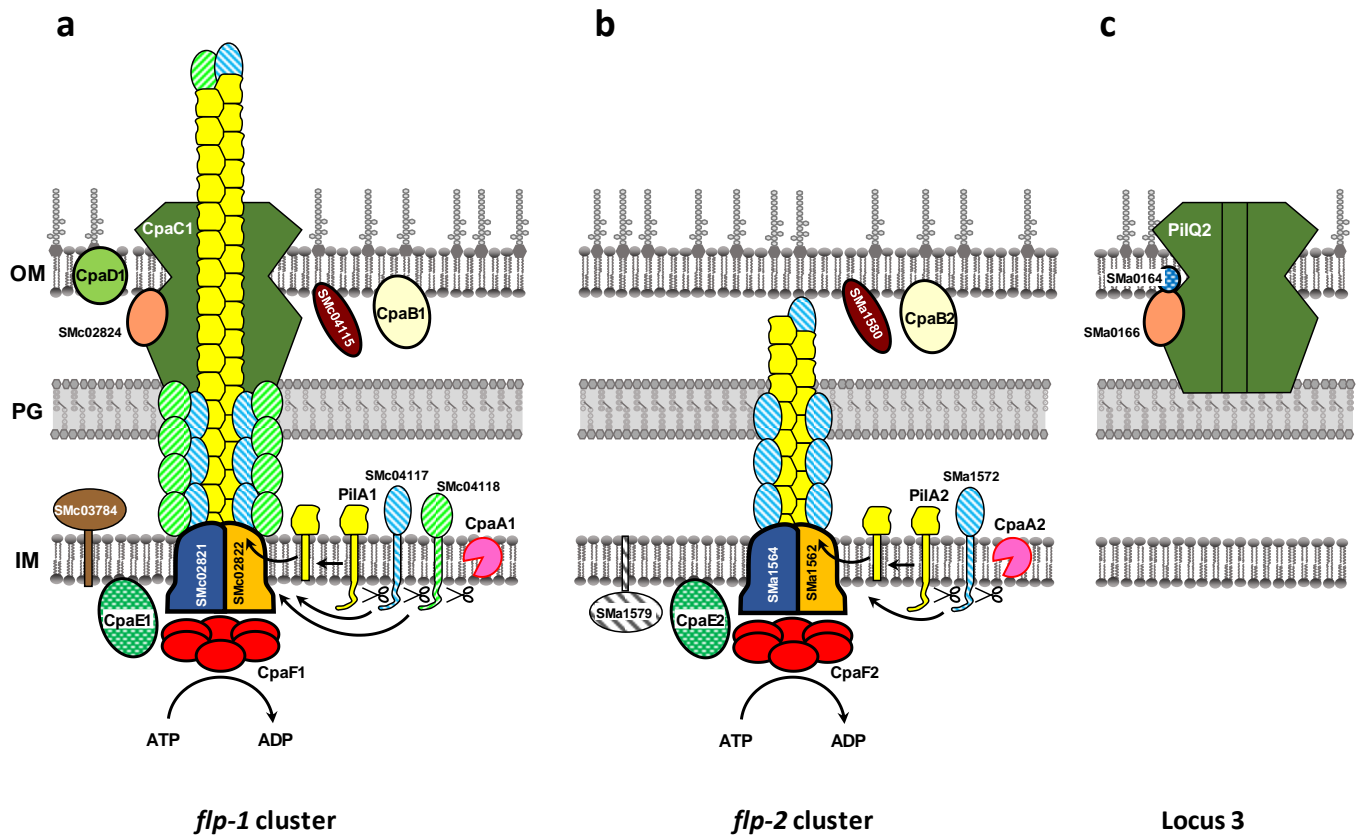

**Figure S1.** Predictive protein composition and structure of the secretion systems encoded by *S. meliloti* *tad/cpa* genes of the *flp-1* cluster (a), *flp-2* cluster (b) and Locus 3 (c). See text in the main manuscript for details.

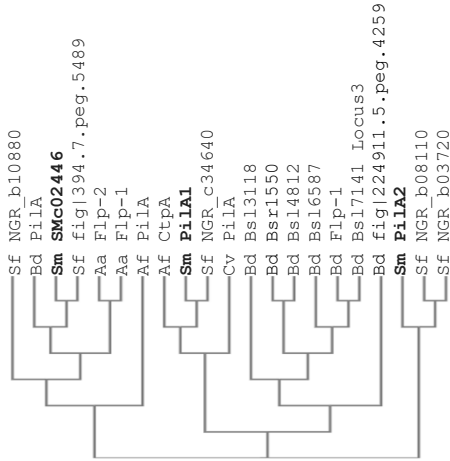

|    |          |                                                            |
|----|----------|------------------------------------------------------------|
| Sm | SmC02446 | -METTRRLRDHGATAVEGLLAAALISVGLLTGLQNFSCALLGMLFVNTVITAAWIT-- |
| Sm | PilA1    | MKTIIFARLKDSEGATAIDYGTAAALISVALIGQAQTLGGASQFTNIGLYLNVENPAP |
| Sm | PilA2    | MKNLILFARNESGATAIDYGLTAGLISVLLITVMGTITGLTTRFTATGTALTGG---- |

---MKAFTVKVSFAREEDGVALSEYLVJLGLL---VGVIAAV---TTVSGN-LAAATWSGUTFTSHLSCDPAALPL  
 MURITPLWSTRNPPSEHYKRIQJQAQGFANEHSEVCHLQGRDPPMLTVYIETREALKRLRTDQGVVSFEYIIIVAVCIYAGAVGGGAGGTGAA-LTGITAIITAFATAFATIG---  
 ---METLRLRLRDHGATAVEYGLIAALI---SVGLIATGL---QNFSGA-LTGITAIITFVNTTEAAWI---  
 ---MDKLRSIVRNRDGAATVEYGLIAALI---SVALIVGL---QGFSE-LNVNLIIADAEDSWT---  
 ---MMDLIDYFYRQVFFSCNFYRNRQGTISVEYGLIAAV---AVFVAVLVDGNSFIKA-LSGKFDLTTTSGVAILVSKSS---  
 ---MLNTLITTKAYIKASEAIRSFRENOAGVTAIEYGLIAFV---AVLIVAVFYSNNGFIAN-LOGKFNSLASTVASANVTK---  
 ---NPVVBETHRMVDEYFVPLHFFINFCNKNENGATAIEYGLIAGII---SAAIIAGL---GNISG-INAVQFOIVDAFPKG---  
 ---MTKIFARFLKDESGATAIEYGLIAALI---SVAIIGGA---STLGGK-LKDFTFIKGSFTDKRASTGGV---  
 ---MKTIFARLMKDESGATAIEYGLIAALI---SVALIGGA---QTLGGA-LSTQFTNLGGLYNVEPNAP---  
 ---MKTIFARLMKDESGATAIEYGLIAALI---SVALITGA---TALGDS-LOSMFNALSQOMTAEITNM---  
 ---MTKFVTRFLKDESGATAIEYGLIIVALI---AVVIVTAV---TTLGTN-LRTAFTKAGAAVSTAAGT---  
 ---MALLKSFLEDSATAIEYGLIAGI---ALVIVTVW---NNTGSALLNNKFNSIDAATK---  
 ---MKTIVHFLRDESGATAIEYGLIAGI---SLAIIAVW---NLGTR-LNTKFSISSLK---  
 ---MICEHACQRYRGATMKNTLKNFLADERGATAIEYGLIAGI---ALAVITVW---NGWGSK-LNTKFGSISTSLK---  
 ---MTRMILKFSWNSGATAIEYGLIAGI---ALAIITVW---NLGTT-MNEKFTSISTSLK---  
 ---MKNLILARFAKDESGATAIEYGLIAGI---ALAIITVW---NNLGST-LNTKFTSISTSLK---  
 ---MVGRRWEAEETRPVVSCTFWEHSMKNILVRFVKDESGATAIEYGLIAGI---ALAIITVW---NNLGST-LNTKFTSISTSLK---  
 ---MKLICLLADFADESGATAIEYGLIAGI---ALAIIEII---YALGTN-LVAKLOSALTALK---  
 ---MKNLILARFARNESGATAIEYGLIAGI---SVVLITVW---GTIGTR-LITRTAIGTATFGG---  
 ---MKNLILLRFRVHESGATAIEYGLITGLI---AV--ITAV---QTVGTD-IDAAPDAIAAL---  
 ---MKNLILRFRVNESGATAIEYGLIAGI---AVVIISAV---QIVGTD-I GAKFTAI STAL---

**Figure S2.** Multiple sequence alignment by MUSCLE of Flp prepilins. **(a)** Alignment of the three putative Flp prepilins of *Sinorhizobium meliloti* (Sm). **(b)** Alignment of the Flp prepilins of *S. meliloti* with known Flp/PilA/CtpA prepilins of *Aggregatibacter actinomycetemcomitans* (Aa), *Caulobacter vibrioides* (Cv), *Agrobacterium fabrum* (Af), putative prepilins of *Sinorhizobium fredii* NGR234 (Sf), and *Bradyrhizobium diazoefficiens* (Bd). Identical residues are indicated with an asterisk. Colons and full stops indicate partial matches. The Flp motif is highlighted in grey. In **(b)** the cladogram obtained in MUSCLE is also shown.

|           |              |                                                                                                                                                                            |                                                                                                                           |
|-----------|--------------|----------------------------------------------------------------------------------------------------------------------------------------------------------------------------|---------------------------------------------------------------------------------------------------------------------------|
| Aa        | RcpA         | -----MNNWHITFGKQLICCAVLGAVFSL-----                                                                                                                                         | -----NAYAQ <b>Q</b> MSLDKGAQLVQVTKKIKIDITFVSSPNIAIDVILIDNITFIYAKBEGRETEVTATGADGRPTSDTVVND                                 |
| Cv        | CpAc         | -----MSREVNLSVKASMSAGSRLLITASVALLAITSTAPVFVDDGIIGSGSHYRPPARVYTPAPAAPVPMVPAEDQVARTVMVTAQ <b>Q</b> AAITLLELAKKSAALVELPEVVDLIVTPQOIAADVATDPRKRIYIVGLVAGQNTDAAFFTAGRRLLSLSLIRV | -----GNGIRKHLFGLKALVLELPEDAADILVADPILADATFTRSRITFIPGRVWGQNTFIIFGGREELVSLDLE                                               |
| Af        | CtpD         | -----MTGLGLMTKRFKHLHRSMSAGGLAFLCTFS-----                                                                                                                                   | -----GEG <b>Q</b> AGTINLGIKAKAVVLELPEDAAILVADPILADATFTRSRITFIPKSVGQNTFIIFVGGEEVSLSLVANE                                   |
| Sm        | CpAc1        | -----MKPFAKKFRASILAAGLSFCLTFS-----                                                                                                                                         | -----GEG <b>Q</b> AGTINLGIKAKAVVLELPEDAAILVADPILADATFTRSRITFIPKSVGQNTFIIFVGGEEVSLSLVANE                                   |
| Sf        | NGR_c34670   | -----MKRSQNTFRCLLAAGLSFSLTFS-----                                                                                                                                          | -----GGCVKRWLQDQKNAVVVLELPTDAADILVADPILADATFTRSRITFIPKSVGQNTFIIFVGGEEVSLSLVANE                                            |
| Bd        | RcpA         | -----MSYDMKKRADLMTWRTSMVRLSFAALA-----                                                                                                                                      | -----GQMARELSLGVKSLVITLPRDIDQVIVVADPKIANVATERSQVATIGAAVQNTNIVVFTISAPQOAAAYDIIVK                                           |
| Bd        | B110666      | -----MNYGDDRAGLRIRGNRARTFWAGAMIT-----                                                                                                                                      | -----ENNDYQRVAVNKKSRITFKYDITAFATIIAGSEFIDVMSKLSLDRHLYVQKQGTGTTNVLIFESAMQIGVLDIVK                                          |
| Bd        | CpAc         | -----MGGGRVSGKTVARLLAFGVMGLGAVALIC-----                                                                                                                                    | -----LJGSLVQVTLAINDTITVPRGKPDQVITGSAEMINIVPELSDOSLFTBKQQTGAIMI SVYDMKRALNGVLDIVRA                                         |
| Sf        | NGR_b10860   | -----MSKGLIKCAARACTLAALAAVLVV-----                                                                                                                                         | -----SSN <b>S</b> SESLVAKGKVITFVAGV <b>Q</b> FEVILVIGIEVIAVTEFILTUSEVYILNVLISLSESVNITFPAEKRGVIGLIDIEV                     |
| <b>Sm</b> | <b>PI102</b> | -----MIRSNGSLIFAFCEVVALIC-----                                                                                                                                             | -----                                                                                                                     |
| Aa        | RcpA         | -----SVWTSIADINKQLKSRPENTNLSVKVKGAVIEGKARQOESDEVRIIVGEALGSRKVTETKLG-----                                                                                                   | -----EDSLPELDKVHYDGVWDNANIDTITQINVKLSWEVNNKLSAEMGNINSHWAGS--G-----                                                        |
| Cv        | CpAc         | -----OPVDOLAAM-----                                                                                                                                                        | -----KV <b>LA</b> MI <b>SVA</b> KGQDWMLQVRLVEVORVITKQLGVDAINAVTIGOLGETOYTFQAPGYGNSGLLGVTGGVK                              |
| Af        | CtpD         | -----RD <b>EGLEAN</b> -----                                                                                                                                                | -----TTCGNNMGDAITFAERQVSOIVNMILTTEGEDQVILKTVAEVSRQVTKOLGENGS--SSSNG--                                                     |
| Sm        | CpAc1        | -----RDA <b>AGLEAN</b> -----                                                                                                                                               | -----GDADIFAEIQNSQYNLITTEGGDQVILKTVAEVSRQVTKOLGEN--GRISD-G-----                                                           |
| Sf        | NGR_c34670   | -----RD <b>AGLEAN</b> -----                                                                                                                                                | -----GDAADIFAEETQSNVLLITVEGEDQVILKTVAEVSRQVTKOLGEN--GRISD-G-----                                                          |
| Bd        | RcpA         | -----RDIN <b>GLEAN</b> -----                                                                                                                                               | -----KVANSYVGRQDWMLKTVAEVARSIVKQLGIDITANLNY--G-----                                                                       |
| Bd        | B110666      | -----RDINGMRAA-----                                                                                                                                                        | -----KVANSYVGRQDWMLKTVAEVARSIVKQLGVLSASINA--G-----                                                                        |
| Bd        | CpAc         | -----IDCN <b>LOQ</b> -----                                                                                                                                                 | -----KVANSYVGRQDWMLKTVAEVARSIVKQLGVLSAANAN--GTNIGNSGLGRVTAAGRTPIGGINT--                                                   |
| Sf        | NGR_b10860   | -----ADPSEVASA-----                                                                                                                                                        | -----V <b>AN</b> LS <b>KTU</b> SSQVQVLNVRVIRNDRVGRKLQGISAAW-S-----                                                        |
| <b>Sm</b> | <b>PI102</b> | -----LDT <b>ILSS</b> -----                                                                                                                                                 | -----                                                                                                                     |
| Aa        | RcpA         | -----MDTTKOPVMTPCTGCGMTAGSLCPVARGGNSDT-----                                                                                                                                | -----SISAFINALDQNSNGKVLAEPNISMISGETADILVGGIEIPFAQRDR-----                                                                 |
| Cv        | CpAc         | -----ANPS-----                                                                                                                                                             | -----SAKGMQAFERGLVRLTAEPNIAAYSGESGKFLVGGEPVETGSDT-----                                                                    |
| Sm        | CpAc1        | -----RNPA-----                                                                                                                                                             | -----RFSYINAMEQGVNRLTAEPNIAAISGDAQKYVGGDFRILAAQOEVIDKE-----                                                               |
| Sf        | NGR_c34670   | -----RNPA-----                                                                                                                                                             | -----TISSYNMEQGVNRLTAEPNIAAISGDAQKYVGGDFRILAAQOEVIDKE-----                                                                |
| Bd        | RcpA         | -----Bd                                                                                                                                                                    | -----SVQATIRAMEVAGVIRLTAEPNIAISGESATFIAGGEPFVAGYACDPTTH--VCTT-----                                                        |
| Bd        | B110666      | -----Bd                                                                                                                                                                    | -----TWNATIRAMEVAGVIRLTAEPNIAISGESATFIAGGEPFVAGYACDPTTH--VCTT-----                                                        |
| Bd        | CpAc         | -----Bd                                                                                                                                                                    | -----NGPP-----                                                                                                            |
| Sf        | NGR_b10860   | -----Bd                                                                                                                                                                    | -----NGAT-----                                                                                                            |
| <b>Sm</b> | <b>PI102</b> | -----Bd                                                                                                                                                                    | -----DGTI-----                                                                                                            |
| Aa        | RcpA         | -----KLOKNRRLALDQVSTIAGNVNFDGIGN-----                                                                                                                                      | -----IPFENTRKAISLFEVANGESFIIIGGLFSSNDLEGINVKVPIIGDIPLIGSFFRSATTERKKELVIAVNVVKPVNE--KDVIVPD--TEKTGTMERFFHTPLKNVY----YKT    |
| Cv        | CpAc         | -----VVISGGRTSLKISTVSELSLIGAFS--MSCTSSGSTN-----                                                                                                                            | -----ITVPGLSVRVSTIVSELPSGSILMAGLLOQTKETLDSLPGMSNPLGLSPRSDFLANQDELWILITPVILDPTPE--QNLCQPADGLQFASDQMTVILGR--LNKVKYKAPAGAN   |
| Af        | CtpD         | -----VVISPGRTSLKIETWSEFTYEGNVV--TNGGGRTIPGS-----                                                                                                                           | -----TMSVRRARETSTIVSELPSGSIVTLAGLVQDNVQMSGLPGMSKIPITGTLIFRSKEFLNETELWILITPVILVRPVAR--NQIARPDNDNFENDAAFMNR--LNKVKYKQDQOQ   |
| Sm        | CpAc1        | -----VVISPGRTSLKIETWSEFTYEGSVV--TGNMSTAIPGN-----                                                                                                                           | -----TELGIRREASTSVSELPSGSIVTLAGLVQDNVQMSGLPGMSKIPITGTLIFRSKDFQSESELWILITPVILVRPVAR--SALSRRPDNDNFENDLESFFLGR--VNRILYGRPEAP |
| Sf        | NGR_c34670   | -----VVISAGRTSLAIETVSEPTYEGSVV--TGNMSTFDPGN-----                                                                                                                           | -----VVISAGRTSLAIETVSEPTYEGSVV--TGNMSTFDPGN--PILGTLIFRSDFORNESESELWILITPVILVRPVAR--SALSRRPDNDNFENDLESFFLGR--VNRILYGRPEAP  |
| Bd        | RcpA         | -----VVISAGRTSLAIETVSEPTYEGSVV--TGNMSTFDPGN-----                                                                                                                           | -----VVISAGRTSLAIETVSEPTYEGSVV--TGNMSTFDPGN--PILGTLIFRSDFORNESESELWILITPVILVRPVAR--SALSRRPDNDNFENDLESFFLGR--VNRILYGRPEAP  |
| Bd        | B110666      | -----VVISAGRTSLAIETVSEPTYEGSVV--TGNMSTFDPGN-----                                                                                                                           | -----VVISAGRTSLAIETVSEPTYEGSVV--TGNMSTFDPGN--PILGTLIFRSDFORNESESELWILITPVILVRPVAR--SALSRRPDNDNFENDLESFFLGR--VNRILYGRPEAP  |
| Bd        | CpAc         | -----VVISAGRTSLAIETVSEPTYEGSVV--TGNMSTFDPGN-----                                                                                                                           | -----VVISAGRTSLAIETVSEPTYEGSVV--TGNMSTFDPGN--PILGTLIFRSDFORNESESELWILITPVILVRPVAR--SALSRRPDNDNFENDLESFFLGR--VNRILYGRPEAP  |
| Sf        | NGR_b10860   | -----VVISAGRTSLAIETVSEPTYEGSVV--TGNMSTFDPGN-----                                                                                                                           | -----VVISAGRTSLAIETVSEPTYEGSVV--TGNMSTFDPGN--PILGTLIFRSDFORNESESELWILITPVILVRPVAR--SALSRRPDNDNFENDLESFFLGR--VNRILYGRPEAP  |
| <b>Sm</b> | <b>PI102</b> | -----VVISAGRTSLAIETVSEPTYEGSVV--TGNMSTFDPGN-----                                                                                                                           | -----VVISAGRTSLAIETVSEPTYEGSVV--TGNMSTFDPGN--PILGTLIFRSDFORNESESELWILITPVILVRPVAR--SALSRRPDNDNFENDLESFFLGR--VNRILYGRPEAP  |
| Aa        | RcpA         | -----LTSNFI-----                                                                                                                                                           | -----KNSGFIQ-----                                                                                                         |
| Cv        | CpAc         | -----AGRAYQ-----                                                                                                                                                           | -----GPVGVIIE-----                                                                                                        |
| Af        | CtpD         | -----AA-PYQ-----                                                                                                                                                           | -----GSVGTIYK-----                                                                                                        |
| Sm        | CpAc1        | -----PAGRYH-----                                                                                                                                                           | -----GNVGFTYK-----                                                                                                        |
| Sf        | NGR_c34670   | -----PVRGYH-----                                                                                                                                                           | -----GNVGFTYK-----                                                                                                        |
| Bd        | RcpA         | -----PGNRYR-----                                                                                                                                                           | -----GTYGFITD-----                                                                                                        |
| Bd        | B110666      | -----PIDGAR-----                                                                                                                                                           | -----GDFGITD-----                                                                                                         |
| Bd        | CpAc         | -----SGEDVK-----                                                                                                                                                           | -----GPYGHILIAETVETVFPFAANQFVVKTN                                                                                         |
| Sf        | NGR_b10860   | -----NGEDVK-----                                                                                                                                                           | -----GPYGHILIAETVETVFPFAANQFVVKTK                                                                                         |
| <b>Sm</b> | <b>PI102</b> | -----ASRQARVVRAPSSGHFLEIQ-----                                                                                                                                             | -----                                                                                                                     |

**Figure S3.** Multiple sequence alignment by MUSCLE of PilQ2-like gene products. Alignment of the amino acid sequences of PilQ2 (SMa0163 Locus 3) of *S. meliloti* with PilQ2-like gene products of *A. actinomycetemcomitans* (Aa), *C. vibrioides* (Cv), *A. fabrum* (Af), *S. fredii* NGR234 (Sf) and *B. diazoefficiens* (Bd). Identical residues are indicated with an asterisk. Colons and full stops indicate partial matches. The Signal peptide motif (Phobius) is highlighted in yellow, the T2SS-T3SS pil N: Pilus formation protein, N-terminal domain (InterPro IPR032789) in green, the BON domain (Pfam PF04975) in red and the T2SS/T3SS Dom: Type II/III secretion system, secretin-like domain (IPR004846 InterPro) in grey.

```

Sf NGR b10850      MSF PRSKRAI---LVLTAAGILSGC-----ADYLNHRDSITFGLGNAVEANKGIH
Sm Sma0164         -MIRRS SRPRGF PGLLFASSIILSGC-----QNHVLRSETIALSAGDAIAANSVMQ
Bd blr3501         -MTKRY-----LVLFAPLILGGC YGLAGNDEM DRYFQRSNTITMSAGDAKEVNAVTH
                   *      *::: . . **.*
Sf NGR b10850      IQDPFPRAAYNTQIASDGKVIHRAIRTYQGSQAQTSAP-----
Sm Sma0164         MVD PWP PRVKQTSLATPAD----LEQYKPQQPNAEQ-----
Bd blr3501         TIHPWPRNVGDRRIAYDARRVGAAVTRYGKTQQPVDQLPDISDPTRQMGVRTTPTQNVNI
                   *: * . : : * . : *
Sf NGR b10850      -----SPSAVILPVATP PNGAAR
Sm Sma0164         -----NGGNGETYPNDTTTQ----
Bd blr3501         EGLGAGSSTGVSVPVGGTGGAPNR
                   . . . * .

```

**Figure S4.** Multiple sequence alignment by MUSCLE of Sma0164 with homologous proteins of *S. fredii* NGR234 (Sf) and *B. diazoefficiens* (Bd). Identical residues are indicated with an asterisk. Colons and full stops indicate partial matches. The prokaryotic membrane lipoprotein lipid attachment site profile is highlighted in yellow. The lipobox motif (LXXC) is indicated with a box.

|           |                |                                                                                                                                             |
|-----------|----------------|---------------------------------------------------------------------------------------------------------------------------------------------|
| Aa        | TadD           | ----- <b>NY</b> SKSLKAVLLGGHLSVTA <b>SA</b> VINKKFLSAD-----KLAAREALYOSTNNIDALITHYDGLKWKEDPLTR-----YKLSIIYKKGDSNSSLIIYLOPLL-----TNS          |
| Bd        | TadD Locus2    | <b>KSPMSRAGT</b> TVRRITIIIMLYCCIGTSLAG <b>CD</b> YITLRAAYAP-----VDPEGG-----DPVOEFTDVKY-----YESDE                                            |
| Sf        | NGR_b10740     | -----MIDQLOSRGLSPILLAAVLVIGGOSAAFDVAFG-----DSAKTLEDOSAVAFY-----DPTSALASSGDSV-----KN                                                         |
| <b>Sm</b> | <b>SMa0166</b> | -----HEMTGASGRSV-----LGRSGGRAPTFLA-----MAIVATV <b>LS</b> CCQTSEVLSGAEF-----DPTSALASSGDSV-----                                               |
| Cv        | CpaO           | -----MCRGALIAVLAPTAIVLTAIVPFAAPFFPAADAGTKAKAPAFVKAASQORTFAARRDPLAQAFWGAEFVDDADAFAGAGLAKAFALGRADFAAIAATKGLIAHPDOT                            |
| Af        | Atu0215        | -----MTAFSLGETRTGILRGACLAALVAVSGCASTNEDPMSTIG-----SIPAAITRSTYHLNMQLQAEETAGKAVRNPKDSVQNTASVLMTKNTQALAVMQQIAIANPADR                           |
| Sm        | SMc02824       | -----MTMQINFESLRRLIATGVAVAMVALISISAGAGCCGRKELITIG-----SIEPLTRFWQSMNATEIAAAAEETIGQAVRNPKDREAGLNYANLLRMTGRNEQALAVMQQVAIVHPADR                 |
| Sf        | NGR_c34740     | -----MRLAVGAAVALMALALGCGGAGCCGRKELITIG-----SIEPLSKFVQSMNATEIAAAAEENIGQAVRDPKREAGLNYANLLRMTGRNEQALAVMQQVAIVHPADR                             |
| Bd        | TadD Locus1    | ----- <b>MQRFPSPARILASLSLVAVVAVMSLGG</b> TAMSKLSDV-TG-----SIGSRA-----EASPPSDPAGAVFYGYERYRANPKDAEALGYQALRANGQARAARVLEQATIANFENK              |
| Bd        | Blr0663        | ----- <b>MSKRILSLASRPA</b> RVL <b>SA</b> LVLLALGGCQT-TGIEDI-TG-----ALGSKS-----EAAASKADGKPTMDALRRERYRAKPSDENVALDYGKALRESQSAQAVAVLEQAVLGHFENK |
| Aa        | TadD           | -----GQLSEKAVLQARNINOLKRYOEALFVENSLLITSPKNEVYNLRGVTVLMMGNENKANEINRAREYFLNDVAVNNILAMLSIVNGDYRNNAVSVLLLPQYLNQVREQRLVHNLIIFALIKN               |
| Bd        | TadD Locus2    | -----FV--RLGLEHFNRG-----SYGLSQRYFKDAVEKSPKDLTAMIGLAASYDRURRFDLAQAAQAQIRLGGETVOILNDQGYSTMLRGNTLSAARRKFEKAYSIDPQNFVIANNLEILNGS--              |
| Sf        | NGR_b10740     | -----DELITTTGLOFKEK-----NYGKSYALYKRAVANVFQDPSAWLGFASADMIGRFEDTSDRAVQOLSKMTIGNSPVYNNNGYSRLRGDLPRAROYFLKAYELDPANETTARNLEIM----                |
| <b>Sm</b> | <b>SMa0166</b> | -----KSDLDQGGKQFMNG-----NYGLAEGRFRKAVELRQDNAAALMGLAACYDRLGRFDLADRAINQLLVAGROPRIVNNMGYSQVLRGEEKAKARKLILLEAPASFGNETIEINAIL----                |
| Cv        | CpaO           | -----GLLIELARAHIAHG-----QGYTAIEEPARKVAALSPKDWRLPLITLLGVAYEQAEEDFEAAHRQALIAAPNEATPMANHAMHLAARGDLAGAEELRRATVLPASGTQVRQNIALAVVGLQ              |
| Af        | Atu0215        | -----EVLAAYGKSOQAAG-----QLEQALSTIQRAQTPDRPDWRLYSAE GAVLDQGRSNEARSRVROALDKPNDPSVLNIGMSYLLSDSDPTAETVLOSALISQFGADSRVRQNIALAVVGLQ               |
| Sm        | SMc02824       | -----EVLGAYGKAOQAAG-----QLEQALATISRAQTPDRPDWRLKSAEGAILDQGRSARLRVREADLKPENEPSVLNIGMSYLLTKDLRTAETVYLSAASQFDAGSVRQNIALAVVGLQ                   |
| Sf        | NGR_c34740     | -----EVLGAYGKAOQAAG-----QLEQALQTIIGRAQTPDRPDWRLKSAEGAVLDQGRSSDARLRVREADLKQNEPTLLNIGMSYLLTKDLRTAETVYLSAASQFDAGSVRQNIALAVVGLQ                 |
| Bd        | TadD Locus1    | -----ALLALYGRALADNG-----NFQAFDVLSKAHSEPDNPDWRLISVQGTALDQGRHDEARSYYASALKIAPGDGPVLSNIGLSYLLSRDLPKAEELRQAYASPRASRVQRNLGIIVVGLQ                 |
| Bd        | Blr0663        | -----ALLAGYGRALADNG-----NFQAFDVLSRAHTEPDPDWRLISQAALDQGRNEEAQQYVATALKIVYPEPOVLNIGLSYLLQNLLPKAEQVLGRAHQNRQNIDARIRANIALVGLQ                    |
| Aa        | TadD           | -----NDIDYAKDIIYKENINTSPDDLINALKKTERTVSNNIAR-----                                                                                           |
| Bd        | TadD Locus2    | -----RRFIERPENNOF-----                                                                                                                      |
| Sf        | NGR_b10740     | -----KNSVYKVAQR-----                                                                                                                        |
| <b>Sm</b> | <b>SMa0166</b> | -----DRS-----                                                                                                                               |
| Cv        | CpaO           | -----GRLFEAEKLVRADLPPEQVANNLAYIRAAVGGQSRWDAMRAGGGR-----                                                                                     |
| Af        | Atu0215        | -----GRFAEAEIRAVOELSAQQAQANLTYLRAMLSQNSMQOLAKMDKRPAG-----                                                                                   |
| Sm        | SMc02824       | -----GRFOEATIIAQOELTSEQEANVAYLRVLSQCGANWQOLAKAD-----                                                                                        |
| Sf        | NGR_c34740     | -----GRFOEATIIAQOELTPEQEAANVAYLRKMLSGKGMATELAKADDGNTN-----                                                                                  |
| Bd        | TadD Locus1    | -----GRFAEATIVKADLPPEQAAANVAYLKEMLSRSDAPGAPKRTFVAALSRPD-----                                                                                |
| Bd        | Blr0663        | -----GREAEAEILIVKADLPPEQAAAAKITAIRLOLLAKKQOQRAEK-----                                                                                       |

**Figure S5.** Multiple sequence alignment by MUSCLE of Sma0166 with TadD-like gene products. Alignment of the amino acid sequences of Sma0166 (Locus 3) of *S. meliloti* with TadD-like gene products of *A. actinomycetemcomitans* (Aa), *C. vibrioides* (Cv), *A. fabrum* (Af), *S. fredii* NGR234 (Sf) and *B. diazoefficiens* (Bd). Identical residues are indicated with an asterisk. Colons and full stops indicate partial matches. The Signal peptide motif (Phobius) is highlighted in yellow and the Tetrapeptide-like helical domain superfamily (TPR-motif) (InterPro IPR011990) is highlighted in grey. The prokaryotic membrane lipoprotein lipid attachment site profile (PROSITE PS51257) and the lipobox motif in Sma0166 are indicated in red letters.

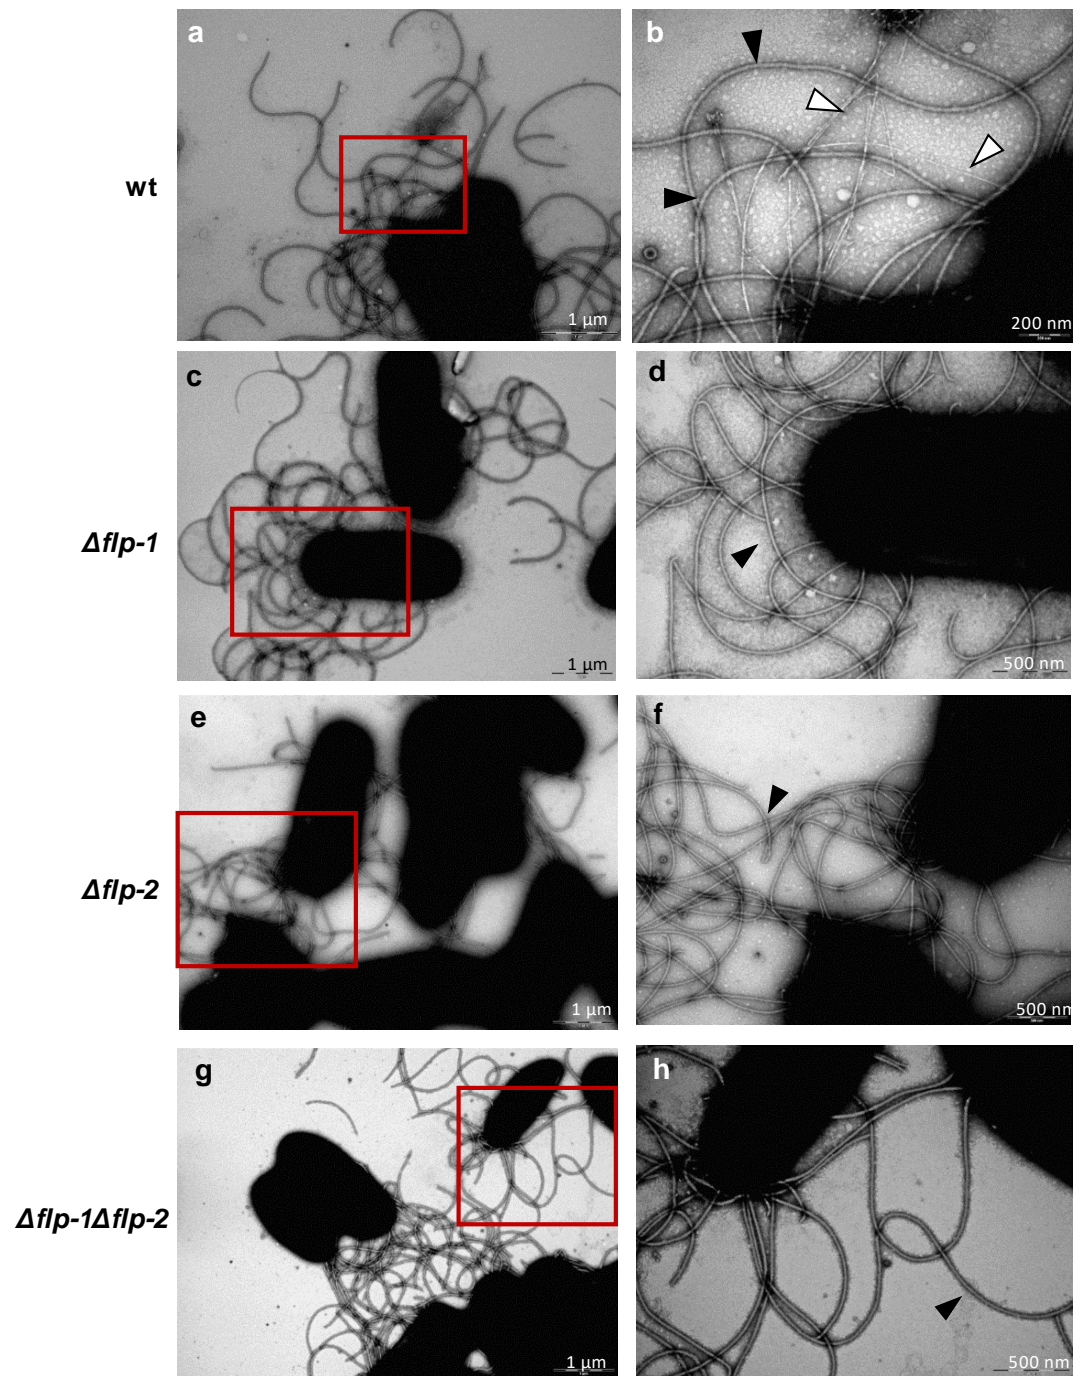

**Figure S6.** Transmission electron microscope (TEM) images of flagella-plus single and double *flp* deletion mutants. Cells were grown on the surface of Minimal Medium (1%) and negatively stained with uranyl acetate (2%). Red squares indicate the zone shown at higher magnification on the right. Solid and open arrowheads indicate flagella and pili-like structures, respectively.

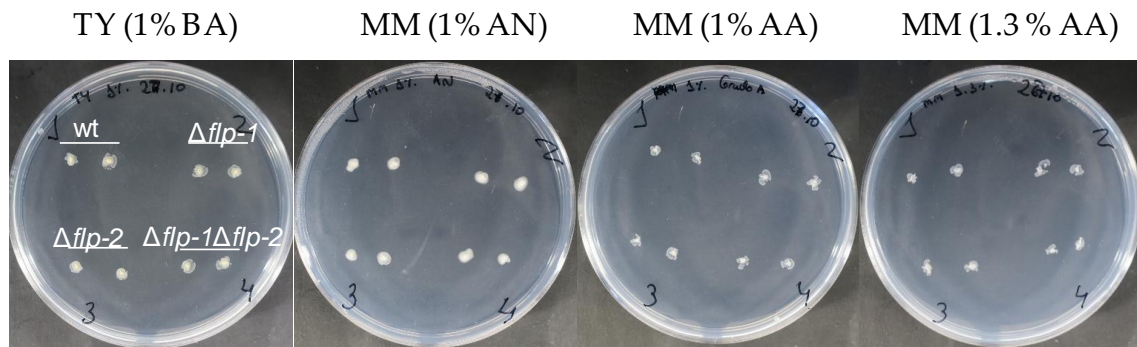

**Figure S7.** Twitching motility assay of duplicate stab inoculations of the different strains on different media with different agar concentrations and types. BA: Bacteriologic Agar; AN: Agar, Noble; AA: Agar, Grade A.

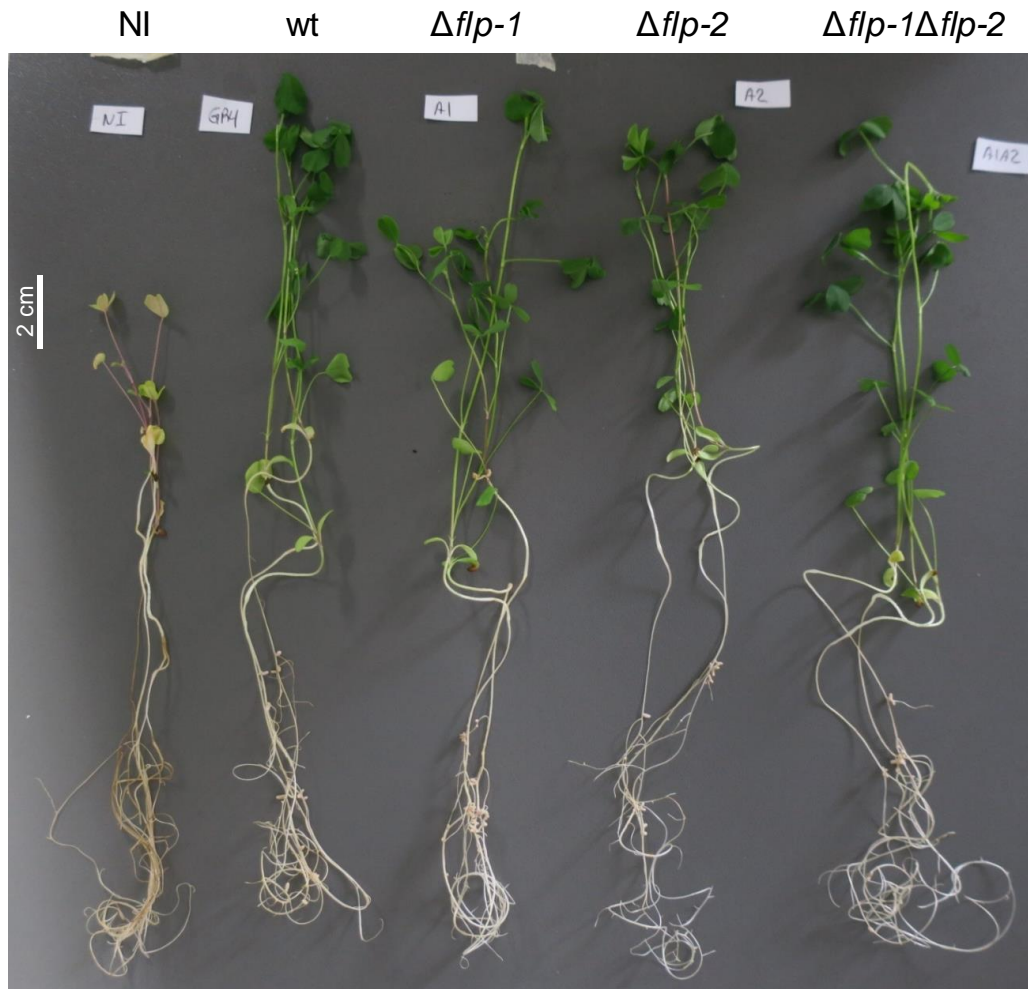

**Figure S8.** Appearance of alfalfa plants inoculated with *S. meliloti flp* mutant strains at the end of the nodulation kinetics experiment. Alfalfa plants were grown in hydroponic culture under axenic conditions in glass tubes. NI, non-inoculated; wt, wild-type strain GR4.

**Table S1.** Percent sequence identities (in parenthesis) among *S. meliloti* T4cP paralogues.

| Locus GR4/Rm1021                                  | Description                                                         | Chromosome <i>flp-1</i>                                                                            | pSymA <i>flp-2</i>                                     | pSymA Locus 3                                          |
|---------------------------------------------------|---------------------------------------------------------------------|----------------------------------------------------------------------------------------------------|--------------------------------------------------------|--------------------------------------------------------|
| <b>Chromosome <i>flp-1</i></b>                    |                                                                     |                                                                                                    |                                                        |                                                        |
| C770_GR4Chr0141/ <i>smc04118</i>                  | CpaK-like pseudopilin                                               | <i>smc04117</i> (35% in 84 aa stretch)                                                             |                                                        |                                                        |
| C770_GR4Chr0142/ <i>smc04117</i>                  | CpaJ-like pseudopilin                                               | <i>smc04118</i> (35% in 84 aa stretch)<br><i>smc04110</i> ( <i>cpaD1</i> ) (25% in 125 aa stretch) | <i>sma1572</i> (40% in 66 aa stretch)                  |                                                        |
| C770_GR4Chr0143/ <i>smc04115</i>                  | CpaI-like putative pili related protein                             | <i>smc04111</i> ( <i>cpaC1</i> ) (21% in 103 aa stretch)                                           | <i>sma1580</i> (36% in 97 aa stretch)                  |                                                        |
| C770_GR4Chr0144/ <i>smc04114</i> ( <i>pilA1</i> ) | Flp pilin subunit                                                   | <i>smc02447</i> (59)                                                                               | <i>sma1570</i> ( <i>pilA2</i> ) (60)                   |                                                        |
| C770_GR4Chr0145/ <i>smc04113</i> ( <i>cpaA1</i> ) | Putative prepilin peptidase                                         |                                                                                                    | <i>sma1578</i> ( <i>cpaA2</i> ) (37)                   |                                                        |
| C770_GR4Chr0146/ <i>smc04112</i> ( <i>cpaB1</i> ) | Component of the outer membrane secretin complex                    |                                                                                                    | <i>sma1576</i> ( <i>cpaB2</i> ) (36)                   |                                                        |
| C770_GR4Chr0147/ <i>smc04111</i> ( <i>cpaC1</i> ) | Component of the outer membrane secretin complex                    | <i>smc04115</i> (21% in 75 aa stretch)                                                             | <i>sma1580</i> (26% in 102 stretch)                    | <i>sma0163</i> ( <i>pilQ2</i> ) (30)                   |
| C770_GR4Chr0148/ <i>smc04110</i> ( <i>cpaD1</i> ) | Component of the outer membrane secretin complex                    | <i>smc04117</i> (25)                                                                               |                                                        |                                                        |
| C770_GR4Chr0149/ <i>smc04109</i> ( <i>cpaE1</i> ) | Putative docking protein of the secretion system                    |                                                                                                    | <i>sma1573</i> ( <i>cpaE2</i> ) (41)                   |                                                        |
| C770_GR4Chr0150/ <i>smc02820</i> ( <i>cpaF1</i> ) | Pilus assembly ATPase                                               |                                                                                                    | <i>sma1568</i> ( <i>cpaF2</i> ) (72)                   |                                                        |
| C770_GR4Chr0151/ <i>smc02821</i>                  | CpaG-like putative inner membrane platform protein                  | <i>smc02822</i> (23)                                                                               | <i>sma1564</i> (45)                                    |                                                        |
| C770_GR4Chr0152/ <i>smc02822</i>                  | CpaH-like putative inner membrane platform protein                  | <i>smc02821</i> (22)                                                                               | <i>sma1562</i> (49)                                    |                                                        |
| C770_GR4Chr0153/ <i>smc04116</i> (TRm22)          | Insertion sequence IS <i>Rm22</i>                                   |                                                                                                    |                                                        |                                                        |
| C770_GR4Chr0154/ <i>smc02824</i>                  | CpaO-like TPR containing protein                                    |                                                                                                    |                                                        |                                                        |
| <b>Chromosomal orphan loci</b>                    |                                                                     |                                                                                                    |                                                        |                                                        |
| C770_GR4Chr2732/ <i>smc02446</i>                  | Flp pilin subunit                                                   | <i>smc04114</i> ( <i>pilA1</i> ) (59)                                                              | <i>sma1570</i> ( <i>pilA2</i> ) (64% in 25 aa stretch) |                                                        |
| C770_GR4Chr2733/ <i>smc02447</i>                  | Hypothetical protein                                                |                                                                                                    |                                                        |                                                        |
| C770_GR4Chr3249/ <i>smc03784</i>                  | CpaM-like polysaccharide deacetylase                                |                                                                                                    |                                                        |                                                        |
| <b>pSymA <i>flp-2</i></b>                         |                                                                     |                                                                                                    |                                                        |                                                        |
| C770_GR4pC0512/ <i>sma1580</i>                    | CpaI-like putative pili related protein                             | <i>smc04115</i> (36% in 97 aa stretch)<br><i>smc04111</i> ( <i>cpaC1</i> ) (26% in 102 aa stretch) |                                                        | <i>sma0163</i> ( <i>pilQ2</i> ) (26% in 98 aa stretch) |
| C770_GR4pC0513/ <i>sma1579</i>                    | Putative pili related protein                                       |                                                                                                    |                                                        |                                                        |
| C770_GR4pC0514/ <i>sma1578</i> ( <i>cpaA2</i> )   | Putative prepilin peptidase                                         | <i>smc04113</i> ( <i>cpaA1</i> ) (38)                                                              |                                                        |                                                        |
| C770_GR4pC0515/ <i>sma1576</i> ( <i>cpaB2</i> )   | Component of the outer membrane secretin complex                    | <i>smc04112</i> ( <i>cpaB1</i> ) (36%)                                                             |                                                        |                                                        |
| C770_GR4pC0516/ <i>sma1573</i> ( <i>cpaE2</i> )   | Putative docking protein of the secretion system                    | <i>smc04109</i> ( <i>cpaE1</i> ) (41)                                                              |                                                        |                                                        |
| C770_GR4pC0517/ <i>sma1572</i>                    | CpaJ-like pseudopilin protein                                       | <i>smc04117</i> (40% in 66 aa stretch)                                                             |                                                        |                                                        |
| C770_GR4pC0518/ <i>sma1570</i> ( <i>pilA2</i> )   | Flp pilin subunit                                                   | <i>smc04114</i> ( <i>pilA1</i> ) (60)<br><i>smc02447</i> (64% in 25 aa stretch)                    |                                                        |                                                        |
| C770_GR4pC0519/ <i>sma1568</i> ( <i>cpaF2</i> )   | Pilus assembly ATPase                                               | <i>smc02820</i> ( <i>cpaF1</i> ) (72)                                                              |                                                        |                                                        |
| C770_GR4pC0520/ <i>sma1564</i>                    | CpaG-like putative inner membrane platform protein                  | <i>smc02821</i> (46)                                                                               |                                                        |                                                        |
| C770_GR4pC0521/ <i>sma1562</i>                    | CpaH-like putative inner membrane platform protein                  | <i>smc02822</i> (49)                                                                               |                                                        |                                                        |
| <b>pSymA Locus 3</b>                              |                                                                     |                                                                                                    |                                                        |                                                        |
| C770_GR4pC1351/ <i>sma0163</i> ( <i>pilQ2</i> )   | RcpA-like putative component of the outer membrane secretin complex | <i>smc04111</i> ( <i>cpaC1</i> ) (30)                                                              | <i>sma1580</i> (26% in 98 aa stretch)                  |                                                        |
| C770_GR4pC1350/ <i>sma0164</i>                    | Hypothetical lipoprotein                                            |                                                                                                    |                                                        |                                                        |
| C770_GR4pC1349/ <i>sma0166</i>                    | CpaO/TadD-like TPR containing protein                               |                                                                                                    |                                                        |                                                        |

**Table S2.** Strains and plasmids used in this study.

| Strain or plasmid             | Relevant characteristics                                                                                                                                         | Reference                |
|-------------------------------|------------------------------------------------------------------------------------------------------------------------------------------------------------------|--------------------------|
| <i>Sinorhizobium meliloti</i> |                                                                                                                                                                  |                          |
| GR4                           | Wild type, Nod <sup>+</sup> , Fix <sup>+</sup>                                                                                                                   | [57]                     |
| GR4flaAB                      | GR4 <i>flaAflaB</i> ; Hyg <sup>r</sup>                                                                                                                           | [10]                     |
| GRflp1                        | GR4 $\Delta$ <i>flp-1</i>                                                                                                                                        | This work                |
| GRflp2                        | GR4 $\Delta$ <i>flp-2</i>                                                                                                                                        | This work                |
| GRflp1flp2                    | GRflp1 $\Delta$ <i>flp-2</i>                                                                                                                                     | This work                |
| GRflaflp1                     | GRflp1 <i>flaAflaB</i> ; Hyg <sup>r</sup>                                                                                                                        | This work                |
| GRflaflp2                     | GRflp2 <i>flaAflaB</i> ; Hyg <sup>r</sup>                                                                                                                        | This work                |
| GRflaflp1flp2                 | GRflp1flp2 <i>flaAflaB</i> ; Hyg <sup>r</sup>                                                                                                                    | This work                |
| <i>Escherichia coli</i>       |                                                                                                                                                                  |                          |
| DH5 $\alpha$                  | <i>supE44</i> , <i>DlacU169</i> , <i>f80</i> ,<br><i>lacZDM</i> , <i>5hsdR171</i> , <i>recA1</i> ,<br><i>endA1</i> , <i>gyrA96</i> , <i>thi-1</i> , <i>relA1</i> | Bethesda Research<br>Lab |
| S17-1                         | <i>thi</i> , <i>pro</i> , <i>recA</i> , <i>hsdR</i> , <i>hsdM</i> ,<br><i>RP4-2-Tc::Mu-Km::Tn7</i>                                                               | [82]                     |
| Plasmids                      |                                                                                                                                                                  |                          |
| pCR-XL-TOPO                   | Cloning vector; Km <sup>r</sup>                                                                                                                                  | Invitrogen               |
| pTOPO- $\Delta$ flp1          | pCR-XL-TOPO carrying the<br>deleted version of the <i>flp-1</i><br>cluster; Km <sup>r</sup>                                                                      | This work                |
| pTOPO- $\Delta$ flp2          | pCR-XL-TOPO carrying the<br>deleted version of the <i>flp-2</i><br>cluster; Km <sup>r</sup>                                                                      | This work                |
| pK18 <i>mobsacB</i>           | Suicide plasmid; Km <sup>r</sup>                                                                                                                                 | [83]                     |
| pK18flaAB::Hyg                | pK18 <i>mobsacB</i> derivative<br>carrying the mutation<br><i>flaAflaB</i> ::Hyg; Km <sup>r</sup> , Hyg <sup>r</sup>                                             | [10]                     |
| pK18- $\Delta$ flp1           | pK18 <i>mobsacB</i> derivative<br>carrying the deleted version<br>of the <i>flp-1</i> cluster; Km <sup>r</sup>                                                   | This work                |
| pK18- $\Delta$ flp2           | pK18 <i>mobsacB</i> derivative<br>carrying the deleted version<br>of the <i>flp-2</i> cluster; Km <sup>r</sup>                                                   | This work                |
| pGUS3                         | Plasmid containing <i>nfeD</i> :: <i>gusA</i> , [87]<br>Km <sup>r</sup>                                                                                          |                          |

---

Hyg<sup>r</sup> and Km<sup>r</sup> indicate hygromycin and kanamycin resistance, respectively.

**Table S3.** List of primers used in this study.

| Name       | Sequence (5'-3') <sup>a</sup>                    | Use                      |
|------------|--------------------------------------------------|--------------------------|
| Rev        | CAGGAAACAGCTATGAC                                | Sequencing               |
| Univ       | GTTTCCCAGTCACGAC                                 | Sequencing               |
| delpilA1.1 | AAAGGATCCGTCTTAATTGCCGCTTGAGG ( <i>Bam</i> HI)   | Deletion in <i>flp-1</i> |
| delpilA1.2 | GCTTGTCTCGTTGCGTCCTTCATCAGG                      |                          |
| delpilA1.3 | CCTGATGAAGGACGCAACGAGGACAAGC                     |                          |
| delpilA1.4 | AAAGGATCCCTCGAACGGACCATGACATCG ( <i>Bam</i> HI)  |                          |
| delpilA2.1 | AAAAAGCTTCTGTTTCGGAGTCAGTCAGG ( <i>Hind</i> III) | Deletion in <i>flp-2</i> |
| delpilA2.2 | GTTCTCCTGTGCCAGCCGTATTCGATGG                     |                          |
| delpilA2.3 | CCATCGAATACGGCTGGCACAGGAGAAC                     |                          |
| delpilA2.4 | AAAAAGCTTTCCTCTCAACGATCAAAGC ( <i>Hind</i> III)  |                          |

<sup>a</sup>Restriction sites are underlined
